# Supplementary material for: Comprehensive Analysis of Transcriptome Variation Uncovers Known and Novel Driver Events in T-Cell Acute Lymphoblastic Leukemia
Source: PLoS Genet. 2013 Dec 19;9(12):e1003997. doi: 10.1371/journal.pgen.1003997 (PMC3868543; doi:10.1371/journal.pgen.1003997)
Supplement: Table S4 — Validated INDELs from the Exome-seq. (XLSX) [file pgen.1003997.s014.xlsx]

## Sheet: Sheet1
Table.S4. Validated INDELs from the Exome-seq
Sample	Gene	Position	Reference/Variant	Notes
TLE80	PHF6	chrX: 133551317	TC/T	Detected in RNA-seq
ALLSIL	NOTCH1	chr9: 139390772	G/GCC	Detected in RNA-seq
DND41	PHF6	chrX: 133511668	G/GA	Detected in RNA-seq
MOLT4	UNC5D	chr8:35541077	AA/A	No variant reads
TLE92	PTEN	chr10: 89717678	ACGGG/A	No variant reads, BWA+BLAT mapping predicts the indel
TLE87	KDM6A	chrX: 44942756	C/CAT	No variant reads, BWA+BLAT predicts a deletion in the adjacent base
DND41	HMCN1	chr1:186017944	G/GA	There are no reads in RNAseq for this gene
CCRFCEM	CT47B1	chrX:120008754	GG/G	There are no reads in RNAseq for this gene
SUPT1	USP9X	chrX:41075721	A/AT	There are variant reads in RNAseq, however the INDEL falls below the detection limit in variant calling step
TLE76	WT1	chr11: 32417942	A/AG	There are variant reads in RNAseq, however the INDEL falls below the detection limit in variant calling step
