# Supplementary material for: Comprehensive Analysis of Transcriptome Variation Uncovers Known and Novel Driver Events in T-Cell Acute Lymphoblastic Leukemia
Source: PLoS Genet. 2013 Dec 19;9(12):e1003997. doi: 10.1371/journal.pgen.1003997 (PMC3868543; doi:10.1371/journal.pgen.1003997)
Supplement: Table S12 — Novel Fusion Transcript validated by RT-PCR and Sanger sequencing. (XLSX) [file pgen.1003997.s022.xlsx]

## Sheet: Sheet1
Table S12. Novel Fusion Transcript validated by RT-PCR and Sanger sequencing
gene1	gene2	Ch1	Ch2	position1	position2	Forward Primer	Reverse Primer	Status
KIAA1267	ARL17A	17q21	17q21	exon 3	exon 3	AGTGGCATAGCCAACTTGAG	CTTCTGGCACCTTTTGTGTT	CONFIRMED	TLE76	NA
NLRP6	RP11-326C3.2	11p15	11p15	intron 5-6	intron	CTCAGAAGCAGTGGAGGAAG	CCTCAATGTCCTGACCACTC	CONFIRMED	TLE76
KCNK17	KIF6	6p21	6p21	exon 1	intron 22-23	CACGTGAAGTTCTGCAACAG	GGAACCACAAGTCCAGAGTG	CONFIRMED	TLE76
HOXA11-AS1	CDK6	7p15	7q21	exon 2	exon 4	TGGGTTGACGATAAAAGGAA	CGAGGTCTGGACTTTCTTCA	CONFIRMED	TLE77	46,XX,del(12)(p11)[3]/46,XX[17] [20]
DPY19L1	HOXA11	7p14	7p15	exon 7	exon 2	GAGGCCTGGTTACAGTGTTG	TTGACGATCAGTGAGGTTGA	CONFIRMED	TLE77
RP11-326C3.2	NLRP6	11p15	11p15	intron	intron 5-6	CCTCAATGTCCTGACCACTC	CTCAGAAGCAGTGGAGGAAG	CONFIRMED	TLE77
CDK6	RPL35P4	7q21	7p15	exon 5	upstream	GTGGATCTCTGGAGTGTTGG	TTGCCTCATTTCTCTTTTGC	CONFIRMED	TLE77
MIR550A1	ZNRF2	7p14	7p14	upstream	exon1	TCCAACTTGAGCAGTCCTTC	GGCAGAAGGAGAAAAGGAGA	NOT CONFIRMED	TLE77
DEFA1B	S1008B	8p23	1q21	exon 3	5'utr	AAGAGCTGATGAGGTTGCTG	CTGCACCCTTTTTCCTGATA	NOT CONFIRMED	TLE79	46,XY [20]
IKZF2	AC093865.1	2q34	2q34	exon 3	intron 1-2	ATGACCTTCCTGGACCAACT	TGGACAATTCTAACCCCAAA	CONFIRMED	TLE80	NA
NUP214	ABL1	9q34	9q34	exon 31	exon 2	CCAACAAAAACCCATTCAGC	GTCCAGCGAGAAGGTTT	CONFIRMED	TLE80
KCNK17	KIF6	6p21	6p21	exon 1	intron 22-23	CACGTGAAGTTCTGCAACAG	GGAACCACAAGTCCAGAGTG	CONFIRMED	TLE80
STAT5B	STAT3	17q21	17q21	utr5p	utr5p	ACCCAGCGCAGGCAACTC	CGGCTATACTGCTGGTCAAT	CONFIRMED	TLE81
RPL10	AC008038.2	Xq28	7q33	utr5p	intron 2-3	ATCCACTTTTGCCTTTTTCC	GCTCACATTCATCCATCTCC	NOT CONFIRMED	TLE81
KCNK17	KIF6	6p21	6p21	exon 1	intron 22-23	CACGTGAAGTTCTGCAACAG	GGAACCACAAGTCCAGAGTG	CONFIRMED	TLE81
IL7R	TRBC2	5p13	7q34	upstream	exon 1	TCCTCTTCACCCATCACTTC	GCTTCTGATGGCTCAAACAC	CONFIRMED	TLE85	46,XY,add(5)(p13),del(6)(q21q2?5),add(7)(q?32),add(8)(q2?4),add(11)(q21),add(14)(q2?4)[6]/46,XY[4] [10]
IL7R	TRBC2	5p13	7q34	intron 5-6	exon 1	AAATGCACATCCACTTCCAC	TGTGGGAGATCTCTGCTTCT	CONFIRMED	TLE85
MIR550A1	ZNRF2	7p14	7p14	upstream	exon1	TCCAACTTGAGCAGTCCTTC	GGCAGAAGGAGAAAAGGAGA	NOT CONFIRMED	TLE85
PAGE2B	ALAS2	Xp11	Xp11	utr5p	exon 1	TCTCCCCACTAGGTGCAATA	ACTGAGGACGAACGAATGAC	CONFIRMED	TLE85
CTSC	RAB38	11q14	11q14	exon 5	exon 2	CACAGTCGAAAAATCCCAAG	GGTTTGCCATTAGGGAGACT	CONFIRMED	TLE86	52,XY,+?X,+8,+10,+11,+13,+19[11]/46,XY[9] [20]
GREB1	E2F6	2p21	2p21	utr5p	upstream	ATGGAATTGTGCAAGACCTC	cagtgtcaggggtcgagtc	NOT CONFIRMED	TLE86
CLINT1	MEF2C	5q33	5q14	exon 1	exon 5	GCAAAGGAAGGAGCTGACT	CACTTGGAGGTCGATGTGTT	CONFIRMED	TLE89	40~44,X,-X,del(3)(q21),-5,add(6)(q2?3),add(7)(p1?),-8,-9,add(12)(p13),-13,-14,add(16)(p13),i(17)(q10),+i(17)(q10),add(21)(p11),+1~6mar[cp11]/46,XX[2] [13]
MGAT5	GPR39	2q21	2q21	exon 12	exon 2	TCCCTTGTGTATGGCAAAGT	GATGACCGAGCTGAGGTAGA	CONFIRMED	TLE89
PCMTD1	PRKAR1B	8q11	7p22	exon 3	downstream	GGAAGTGGAACCGGATATTT	GTATCCCAGGGTGGCTAAGT	CONFIRMED	TLE89
L3MBTL3	PTPRK	6q23	6q22	exon 24	exon 2	TCCTTTAAGTCCCCAATTCC	CACTAACATGCACCCATTCA	CONFIRMED	TLE89
UGCG	PVT1	9q31	8q24	exon 2	exon 1	GGATCTACCCCTTTCAGTGG	ACCTTCCAGTGGATTTCCTT	CONFIRMED	TLE89
FARSB	AC016712.2	2q36	2q36	exon 2	upstream	AACCAATCCTTCCAGACACA	GTGAACAGCAGGATGGAAAG	CONFIRMED	TLE89
EEF1G	OOEP	11q12	6q13	exon 7	upstream	GCTCACATTCATCCATCTCC	CAGTTTTCATCCGAATCCAC	NOT CONFIRMED	TLE89
RPL10	AC008038.2	Xq28	7q33	utr5p	intron 2-3	ATCCACTTTTGCCTTTTTCC	GCTCACATTCATCCATCTCC	NOT CONFIRMED	TLE89
SGCA	PPP1R9B	17q21	17q21	exon 4	intron 1-2	CAGAGGTGACGTTGAGCAG	CTCATCCAGCTCCCATACAG	NOT CONFIRMED	TLE89
RP5-947P14.2	CD53	1p21	1p13	upstream	intron 5-6	GCAGCCAAAGTCCTTCAGTA	GGGCTAGTTCCTTTTTCTGG	NOT CONFIRMED	TLE89
SFTA3	TRDC	14q13	14q34	exon 1	exon 1	TCAGGCGATCCAGATAAGAG	ACAAGCGACATTTGTTCCAT	CONFIRMED	TLE90	NA
ZNF219	HNRNPC	14q11	14q11	exon 3	utr5p	TTCTTTGGTTCTGGGAAGTG	GCCATTTTGTGAAGAGACGA	CONFIRMED	TLE90
HNRNPC	ZNF219	14q11	14q11	utr5p	utr5p	CGGGAGTAGGAGACTCAGAA	TTCTTTGGTTCTGGGAAGTG	CONFIRMED	TLE90
KIAA1267	ARL17A	17q21	17q21	exon 3	exon 3	AGTGGCATAGCCAACTTGAG	CTTCTGGCACCTTTTGTGTT	NOT CONFIRMED	TLE90
NLRP6	RP11-326C3.2	11p15	11p15	intron 5-6	intron	CTCAGAAGCAGTGGAGGAAG	CCTCAATGTCCTGACCACTC	CONFIRMED	TLE91	NA
CTSC	RAB38	11q14	11q14	exon 5	exon 2	CACAGTCGAAAAATCCCAAG	GGTTTGCCATTAGGGAGACT	CONFIRMED	TLE91
NLRP6	RP11-326C3.2	11p15	11p15	intron 5-6	intron	CCTCAATGTCCTGACCACTC	CTCAGAAGCAGTGGAGGAAG	CONFIRMED	TLE92	46,XY [14]
B4GALT3	TPM3	1q23	1q21	exon 5	exon 8	GCCAGAAAATGACCACAATC	CAGCCCTCAGTTAAAGGTCA	CONFIRMED	TLE92
JAK2	TPM3	9p24	1q21	exon 17	exon 7	TCTCCTCCACTGCAGATTTC	ACTGATGGACCAGAACCTGA	CONFIRMED	TLE92
MGAT4A	CXCR4	2q11	2q21	utr5p	exon 1	TCATTTCACCATCACACTGG	GCAGCAGGTAGCAAAGTGAC	CONFIRMED	TLE92
MIR550A1	ZNRF2	7p14	7p14	upstream	exon1	TCCAACTTGAGCAGTCCTTC	GGCAGAAGGAGAAAAGGAGA	NOT CONFIRMED	TLE92
ASCC1	MAFG	10q22	17q25	exon 5	exon 3	ATTCTATCCCTGCCATCTCC	CTTCTCCAGCTCCTCCTTCT	CONFIRMED	TLE92
ZEB1	BMI1	10p11	10p12	5'UTR	exon 2	GGAGGTGACTCGAGCATTTA	GTGGCATCAATGAAGTACCC	CONFIRMED	R1	NA
MYB	AHI1	6q23	6q23	upstream	intron 24-25	AGGCTCTCCATAACCCAAAC	GCAAGCGTTTCATAGTTGGT	CONFIRMED	RM2	46,XY, -6
MT-ND4	MT-ND1	MT	MT			CTGCCTACGACAAACAGACC	ATTCGATGTTGAAGCCTGAG	NOT CONFIRMED	R3	46,XY [20]
MT-ND4	MT-CO2	MT	MT			ACTCACTCTCACTGCCCAAG	GAAACTGTGGTTTGCTCCAC	NOT CONFIRMED	R3
RIC3	TRBC1	11p15	7q34	exon 1	exon1	CGTACTCCACAGTGCAGAGA	AGAGCCCGTAGAACTGGACT	CONFIRMED	R4	FISH: del(6q)
SSBP2	FER	5q14	5q21	exon 16	exon 14	GGAGGAATGGAGTCACATCA	TGCTTGAGAATTTTGGCTTC	CONFIRMED	R4
GUK1	ARF1	1q42	1q42	exon 1	exon 1	CGCTGTCACGTAGGTTCAGT	GCTTGTAGAGGATCGTGGTC	CONFIRMED	R4
FUS	SET	16p11	9q34	exon 1	exon 2	GTCGGTACTCAGCGGTGTT	GATTTTGGCGATCAATTCTG	CONFIRMED	R4
OAZ1	RNF126	19p13	19p13	exon 1	exon 2	TCCTCAATAGCCACTGCTTC	TTTTCTGTGCTCCTGGTCTC	CONFIRMED	R4
CTSC	RAB38	11q14	11q14	exon 5	exon 2	CACAGTCGAAAAATCCCAAG	GGTTTGCCATTAGGGAGACT	CONFIRMED	R5	NA
NUP98	PSIP1	11p15	9p22	exon 9	exon 7	CACCAACACCATGGGATTAT	CAGATGCTGTTGCTGTTGTC	CONFIRMED	R5
PSIP1	NUP98	9p22	11p15	exon 6	exon 10	GAAGAAAAAGCCAGCAATGA	ATTTGTGCCAAAACCAAAGA	CONFIRMED	R5
IKZF1	ABCA13	7p12	7p12	exon 5	intron 3-4	TGCTCATGGTTCACAAAAGA	CGCTGGTATCAGGAGTGAAG	CONFIRMED	R6	46xy, t(7;10)(p15;q22) [9] [20]/FISH:del p15/p16
CDKN2A	IFNWP19	9p21	9p21	exon 1	intron 3-4	CTCGTGCTGATGCTACTGAG	ATGACCTTCCTGGACCAACT	CONFIRMED	R6
NLRP6	RP11-326C3.2	11p15	11p15	intron 5-6	intron	CTCAGAAGCAGTGGAGGAAG	CCTCAATGTCCTGACCACTC	CONFIRMED	R6
MT-ND4	MT-CO2	MT	MT			ACTCACTCTCACTGCCCAAG	GAAACTGTGGTTTGCTCCAC	NOT CONFIRMED	R7	47xx, del(9)(p12), t(10;11)(q?;q?), der(11)t(10;11)[15] [20]/FISH: del p15/p16
NLRP6	RP11-326C3.2	11p15	11p15	intron 5-6	intron	CTCAGAAGCAGTGGAGGAAG	CCTCAATGTCCTGACCACTC	CONFIRMED	R8	NA
MIR550A1	ZNRF2	7p14	7p14	upstream	exon1	TCCAACTTGAGCAGTCCTTC	GGCAGAAGGAGAAAAGGAGA	NOT CONFIRMED	R8
NLRP6	RP11-326C3.2	11p15	11p15	intron 5-6	intron	CTCAGAAGCAGTGGAGGAAG	CCTCAATGTCCTGACCACTC	CONFIRMED	R9	FISH: del (6q)
DDX3X	MLLT10	Xp11	10p12	exon 6	exon 6	AAATTTGAACGTGGTGGAAA	GTTACATGGAAAGCCTGTCG	CONFIRMED	R10	t(X;10)(p12;p15)
DDX3X	MLLT10	Xp11	10p12	intron 6-7	intron 5-6	ACTGCAGGATGGATGTTGTT	ATCAGCTGTTGGTTGGTTGT	CONFIRMED	R10
MLLT10	DDX3X	10p12	Xp11	intron 5-6	intron 6-7	TCTCCTTAGGCCTCCTTGTT	AAGCTCAATGTTTCCCATGA	CONFIRMED	R10
MLLT10	DDX3X	10p12	Xp11	exon 5	exon 7	GAGAGAGCAGCCAGAGTGAG	AAATGCTGCAGTTTTTCCAG	CONFIRMED	R10
RP11-129J12.1	NKX2-3	10q24	10q24	exon 2	upstream	ACGTCCTAGGAGGCTGAGAT	AGTCCTGAAGTCCGAGACG	NOT CONFIRMED	R10
TLX1NB	TRDC	10q24	14q11	intron 1-2	exon 1	CAGACATGACCTGCCCTAAG	TTGTTGTTTGGGGCTGTATT	CONFIRMED	TUG5	47,XY,+mar[9]/47,XY,add(7)(q35),+mar[4]/46,XY[16]
PLAG1	TRBJ2-7	8q12	7q34	intron 1-2	exon 1	TGGCTCCCATTCGTAATAAA	CCAGTCTTTCCCCAGGAG	CONFIRMED	TUG5
